# Supplementary material for: Online total organic carbon (TOC) monitoring for water and wastewater treatment plants processes and operations optimization
Source: Copernicus journal article supplement (doi:10.5194/dwes-10-61-2017), 2017-08-07
Supplement: Supplementary file 1 [file dwes-10-61-2017-supplement.zip]

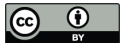

## *Supplement of*

# **Online total organic carbon (TOC) monitoring for water and wastewater treatment plants processes and operations optimization**

**Céline Assmann et al.**

*Correspondence to:* Céline Assmann ([celine.assmann@ge.com](mailto:celine.assmann@ge.com)) and Amanda Scott ([amanda.scott@ge.com](mailto:amanda.scott@ge.com))

- [dwes-10-61-2017-supplement-title-page.pdf](#)
- [TwinOaks\\_Data\\_Summary\\_Publication.xlsx](#)

The copyright of individual parts of the supplement might differ from the CC BY 3.0 License.
